# Supplementary material for: Sub-nanometer Ru clusters on Sm2O3 obtained from a room temperature ion adsorption method for ammonia synthesis
Source: Royal Society of Chemistry journal article supplement (doi:10.1039/d2cy01653b), 2022-01-01
Supplement: d2cy01653b1.pdf [file d2cy01653b1.pdf]

## Electronic supplementary information (ESI)

### **Sub-nanometer Ru clusters on Sm<sub>2</sub>O<sub>3</sub> obtained from a room temperature ion adsorption method for ammonia synthesis**

Jiemin Wang<sup>a,b</sup>, Lin Liu<sup>b,c\*</sup>, Xilun Zhang<sup>b,c</sup>, Jiafeng Yu<sup>b,c</sup>, Xiaohua Ju<sup>b</sup>, Ji Feng<sup>b,c</sup>, Jianping Guo<sup>b,c</sup>, Teng He<sup>b,c</sup>, Ping Chen<sup>b,c</sup>

<sup>a</sup>Zhang Dayu School of Chemistry, Dalian University of Technology, Dalian 116024, China

<sup>b</sup>Dalian National Laboratory for Clean Energy, State Key Laboratory of Catalysis, Dalian Institute of Chemical Physics, Chinese Academy of Sciences, Dalian 116023, China

<sup>c</sup>University of Chinese Academy of Sciences, Beijing 100049, China

E-mail: liulin@dicp.ac.cn

**Table S1**Properties of Ru/Sm<sub>2</sub>O<sub>3</sub> catalysts.

| Sample                               | Ru loading <sup>a</sup><br>(wt%) | Surface area <sup>b</sup> (m <sup>2</sup><br>g <sup>-1</sup> ) |
|--------------------------------------|----------------------------------|----------------------------------------------------------------|
| Sm(OH) <sub>3</sub>                  | –                                | 58.3                                                           |
| 2% Ru/Sm <sub>2</sub> O <sub>3</sub> | 1.9                              | 41.0                                                           |
| 3% Ru/Sm <sub>2</sub> O <sub>3</sub> | 2.6                              | 49.6                                                           |
| 4% Ru/Sm <sub>2</sub> O <sub>3</sub> | 3.3                              | 54.3                                                           |
| 5% Ru/Sm <sub>2</sub> O <sub>3</sub> | 5.6                              | 56.2                                                           |

<sup>a</sup> Determined by ICP-OES<sup>b</sup> Determined by Nitrogen adsorption/desorption isotherms.

**Table S2**EXAFS data fitting results of Ru foil and Ru/Sm<sub>2</sub>O<sub>3</sub> samples with different Ru loading.

| Sample                               | Ru–Ru      |         | Ru–O      |         | D. W.              | $\Delta E_0$ (eV) | R factor |
|--------------------------------------|------------|---------|-----------|---------|--------------------|-------------------|----------|
|                                      | R (Å)      | CN      | R (Å)     | CN      |                    |                   |          |
| Ru foil                              | 2.648±0.00 |         |           |         | 0.0024±0.0008      | -3.9±1.1          | 0.024    |
|                                      | 6          | 6       | –         | –       |                    |                   |          |
|                                      | 2.696±0.00 | 6       |           |         |                    |                   |          |
| 3% Ru/Sm <sub>2</sub> O <sub>3</sub> |            | 6       |           |         | 0.0053±0.0015 (O)  | -4.4±1.6 (O)      | 0.012    |
|                                      | 2.75±0.03  | 1.9±0.9 | 2.00±0.01 | 5.4±0.6 | 0.0104±0.0049 (Ru) | 1.5±3.0 (Ru)      |          |
| 4% Ru/Sm <sub>2</sub> O <sub>3</sub> |            | 6       |           |         | 0.0032±0.0019 (O)  | -6.6±2.4 (O)      | 0.018    |
|                                      | 2.70±0.01  | 2.6±0.9 | 1.99±0.01 | 4.3±0.7 | 0.0048±0.0028 (Ru) | -6.9±2.3 (Ru)     |          |
| 5% Ru/Sm <sub>2</sub> O <sub>3</sub> |            | 6       |           |         | 0.0054±0.0017 (O)  | -6.4±2.0 (O)      | 0.014    |
|                                      | 2.72±0.01  | 2.0±0.8 | 1.98±0.01 | 5.4±0.7 | 0.0059±0.0034 (Ru) | -2.0±2.5 (Ru)     |          |

*R*, distance between absorber and backscatter atoms; *CN*, coordination number; *D. W.*, Debye-Waller factor;  $\Delta E_0$ , inner potential correction to account for the difference in the inner potential between the sample and the reference compound. R factor is used to value the goodness of the fitting.

**Table S3**

Catalyst activities for ammonia synthesis over various catalysts operated under similar conditions.

| Catalysts                                                | Ru loading (wt%) | Temperature (°C) | Pressure (MPa) | WHSV (mL g <sub>cat</sub> <sup>-1</sup> h <sup>-1</sup> ) | NH <sub>3</sub> synthesis rate (μmol g <sub>cat</sub> <sup>-1</sup> h <sup>-1</sup> ) | Ref.      |
|----------------------------------------------------------|------------------|------------------|----------------|-----------------------------------------------------------|---------------------------------------------------------------------------------------|-----------|
| Ru/Sm <sub>2</sub> O <sub>3</sub>                        | 5.0              | 400              | 1.0            | 24000                                                     | 23040                                                                                 | This work |
| Ru/Sm <sub>2</sub> O <sub>3</sub>                        | 4.0              | 400              | 1.0            | 24000                                                     | 22570                                                                                 | This work |
| Ru/Sm <sub>2</sub> O <sub>3</sub>                        | 4.0              | 400              | 1.0            | 18000                                                     | 20590                                                                                 | This work |
| Ru/Sm <sub>2</sub> O <sub>3</sub>                        | 5.0              | 400              | 1.0            | 24000                                                     | 19100                                                                                 | 1         |
| Ru/Sm <sub>2</sub> O <sub>3</sub>                        | 5.0              | 400              | 1.0            | 24000                                                     | 32000                                                                                 | 1         |
| Ru-Ba/AC                                                 | 9.1              | 400              | 1.0            | 18000                                                     | 8285                                                                                  | 2         |
| Ru-Cs/MgO                                                | 6.0              | 400              | 1.0            | 18000                                                     | 12117                                                                                 | 2         |
| Ru/C12A7:e <sup>-</sup>                                  | 4.0              | 400              | 1.0            | 18000                                                     | 6089                                                                                  | 2         |
| Ru/Pr <sub>2</sub> O <sub>3</sub>                        | 5.0              | 400              | 1.0            | 18000                                                     | 19000                                                                                 | 3         |
| Ru/La <sub>0.5</sub> Ce <sub>0.5</sub> O <sub>1.75</sub> | 5.0              | 400              | 1.0            | 72000                                                     | 64000                                                                                 | 4         |
| Ru/BaTiO <sub>2.5</sub> H <sub>0.5</sub>                 | 4.3              | 400              | 5.0            | 66000                                                     | 20700                                                                                 | 5         |
| Ru/CaH <sub>2</sub>                                      | 2.0              | 340              | 0.1            | 36000                                                     | 4002                                                                                  | 6         |
| Ru/Ca <sub>2</sub> N:e <sup>-</sup>                      | 1.8              | 340              | 0.1            | 36000                                                     | 3386                                                                                  | 7         |

**Table S4**

The chloride content in the reduced and activated 4% Ru/Sm<sub>2</sub>O<sub>3</sub> sample was determined by XRF

| sample                                         | Sm <sub>2</sub> O <sub>3</sub> (wt%) | Ru (wt%) | Cl (wt%) |
|------------------------------------------------|--------------------------------------|----------|----------|
| Reduced 4% Ru/Sm <sub>2</sub> O <sub>3</sub>   | 94.84                                | 4.15     | 0.26     |
| Activated 4% Ru/Sm <sub>2</sub> O <sub>3</sub> | 94.32                                | 4.26     | 0.27     |

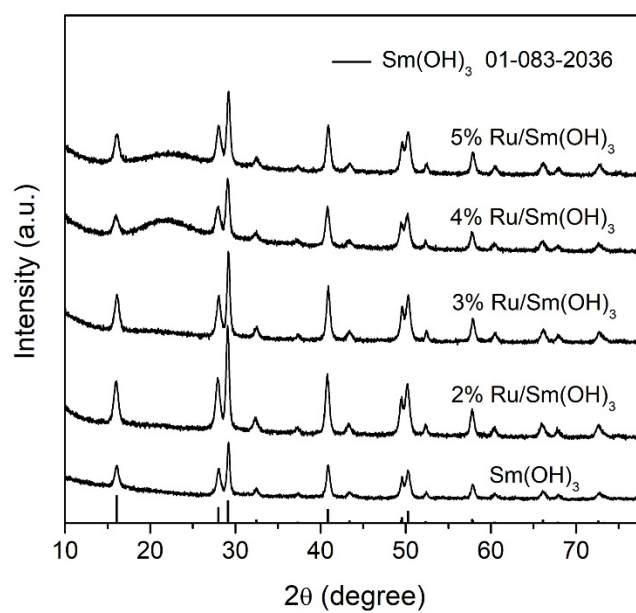

**Fig. S1.** XRD patterns of Sm(OH)<sub>3</sub> and Ru/Sm(OH)<sub>3</sub> composites with different Ru mass loading.

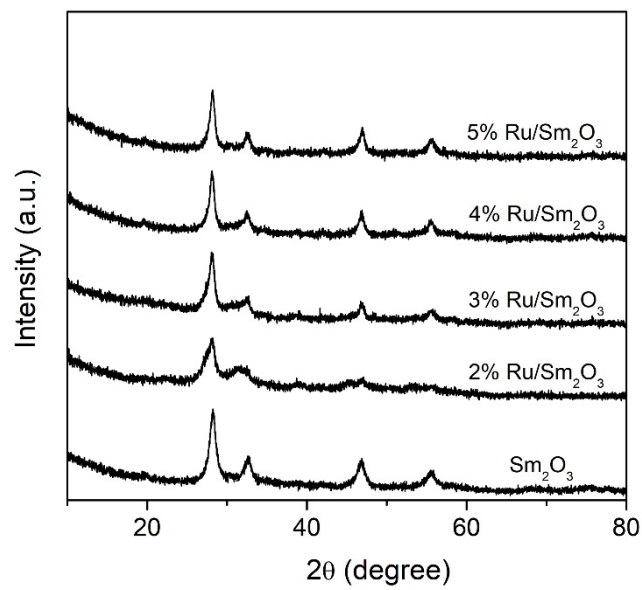

**Fig. S2.** XRD patterns of Sm<sub>2</sub>O<sub>3</sub> and Ru/Sm<sub>2</sub>O<sub>3</sub> samples with different Ru mass loading.

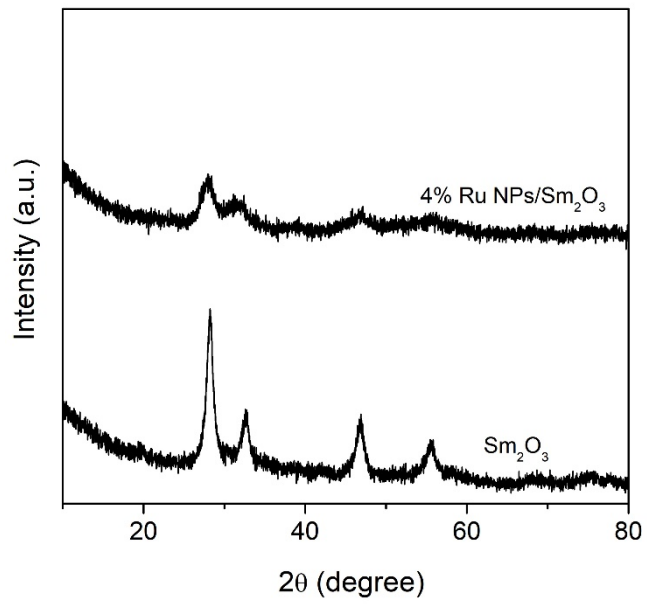

**Fig. S3.** XRD patterns of Sm<sub>2</sub>O<sub>3</sub> and 4% Ru NPs/Sm<sub>2</sub>O<sub>3</sub> sample.



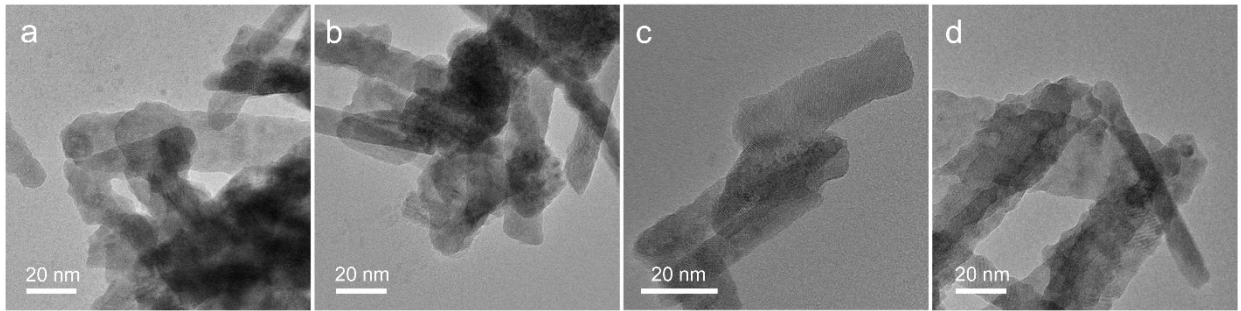

**Fig. S4.** TEM images of 2% Ru/Sm<sub>2</sub>O<sub>3</sub> (a), 3% Ru/Sm<sub>2</sub>O<sub>3</sub> (b), 4% Ru/Sm<sub>2</sub>O<sub>3</sub> (c) and 5% Ru/Sm<sub>2</sub>O<sub>3</sub> (d).

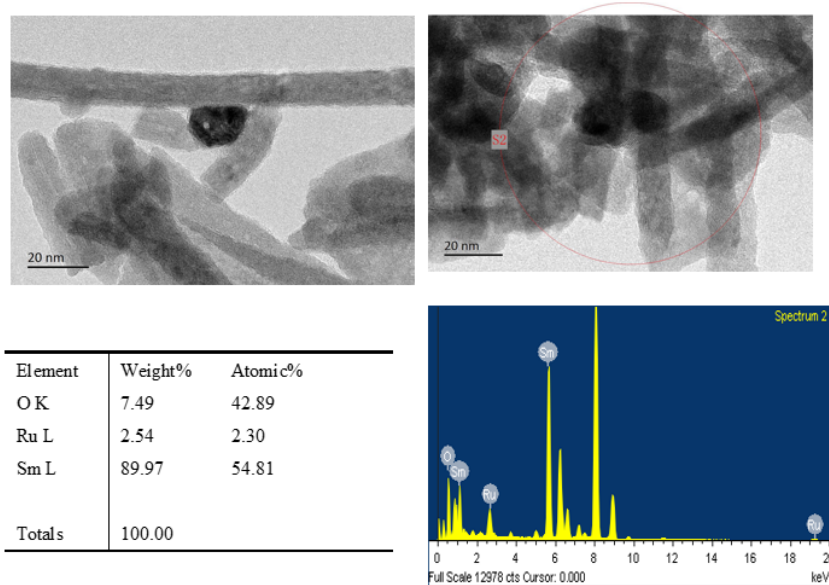

Fig. S5. TEM images and Energy Dispersive X-Ray (EDX) spectrum of Ru NPs/Sm<sub>2</sub>O<sub>3</sub> catalyst.

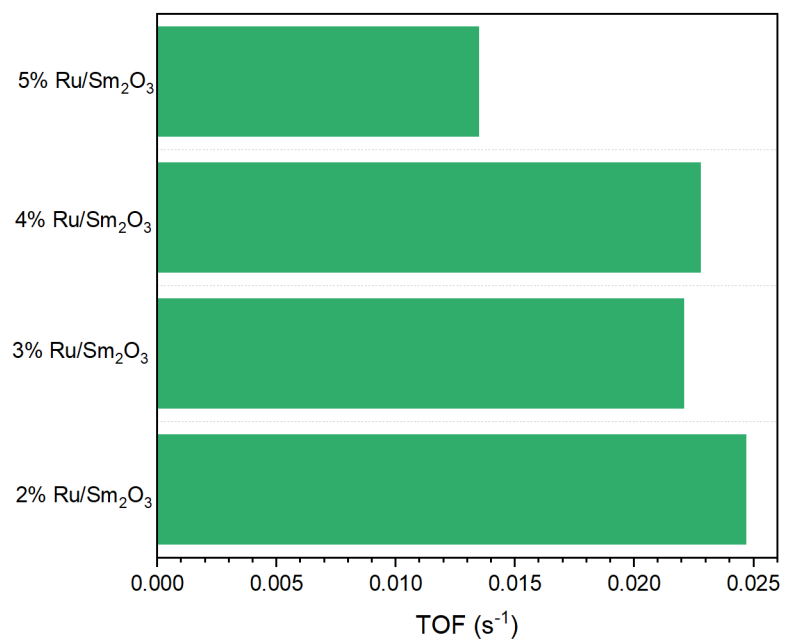

Fig.S6. TOF<sub>NH<sub>3</sub></sub> of 2% Ru/Sm<sub>2</sub>O<sub>3</sub>, 3% Ru/Sm<sub>2</sub>O<sub>3</sub>, 4% Ru/Sm<sub>2</sub>O<sub>3</sub> and 5% Ru/Sm<sub>2</sub>O<sub>3</sub> at 400 °C under 1.0 MPa.

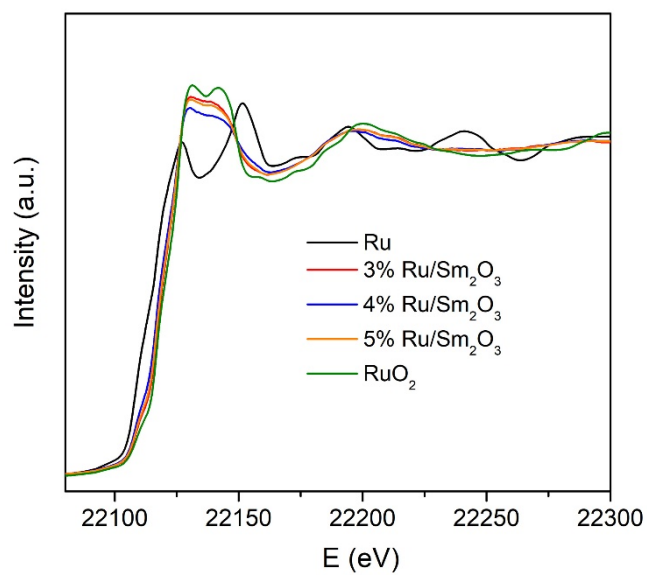

**Fig. S7.** The normalized Ru K-edge XANES profiles of 3% Ru/Sm<sub>2</sub>O<sub>3</sub>, 4% Ru/Sm<sub>2</sub>O<sub>3</sub> and 5% Ru/Sm<sub>2</sub>O<sub>3</sub>. Ru foil and RuO<sub>2</sub> were included as references.

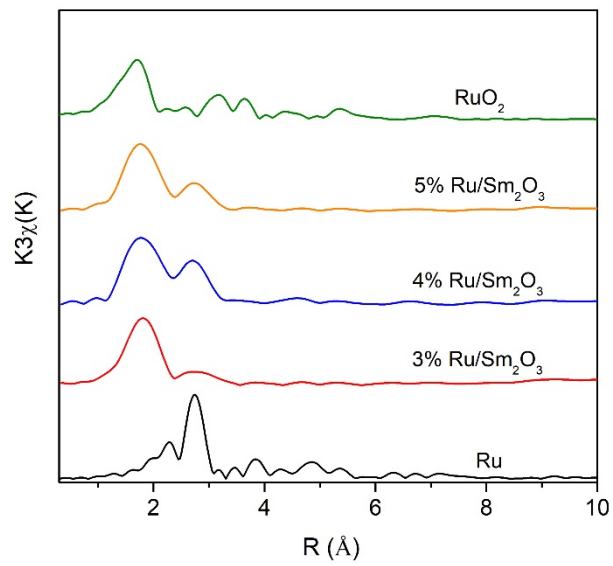

**Fig. S8.** Ru K-edge EXAFS spectra of 3%  $\text{Ru}/\text{Sm}_2\text{O}_3$ , 4%  $\text{Ru}/\text{Sm}_2\text{O}_3$  and 5%  $\text{Ru}/\text{Sm}_2\text{O}_3$ . Ru foil and  $\text{RuO}_2$  were included as references.

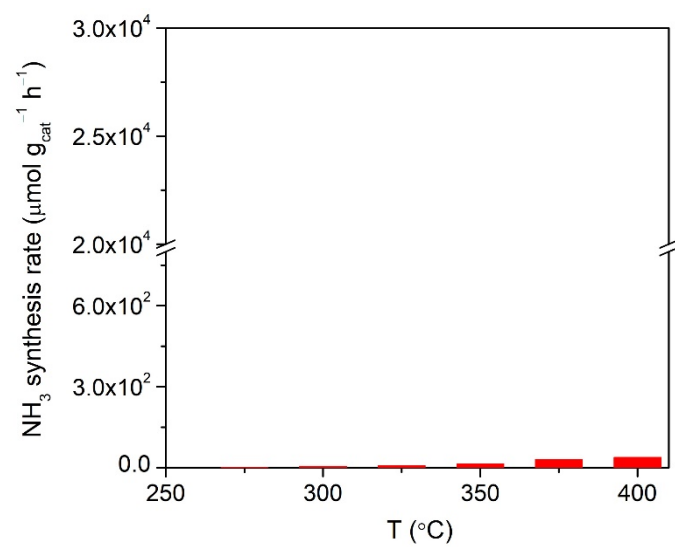

**Fig. S9.** Catalytic performance of bare Sm<sub>2</sub>O<sub>3</sub> support under 1.0 MPa as a function of temperature.

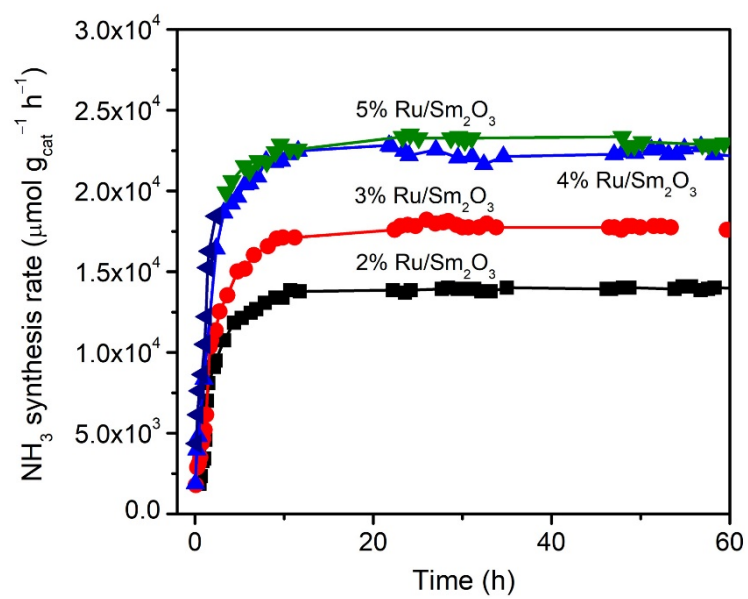

**Fig. S10.** Catalytic behavior of Ru/ $\text{Sm}_2\text{O}_3$  samples at 400 °C under 1.0 MPa as a function of time.

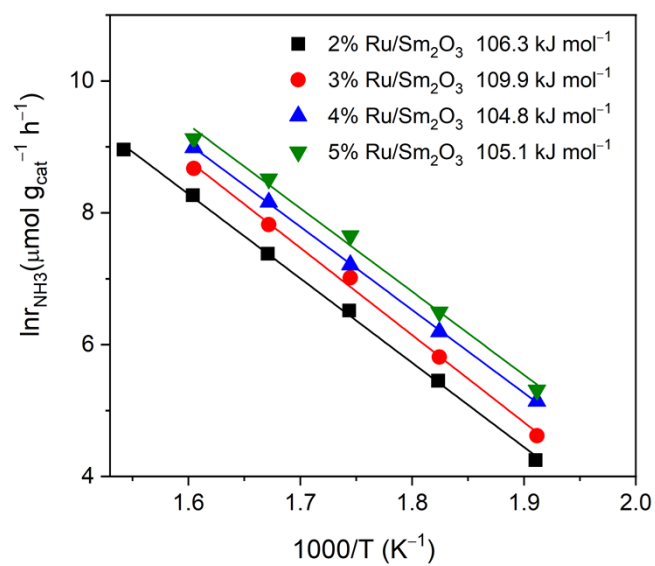

**Fig. S11.** Arrhenius plots of 2% Ru/ $\text{Sm}_2\text{O}_3$  (■), 3% Ru/ $\text{Sm}_2\text{O}_3$  (●), 4% Ru/ $\text{Sm}_2\text{O}_3$  (▲) and 5% Ru/ $\text{Sm}_2\text{O}_3$  (▼).



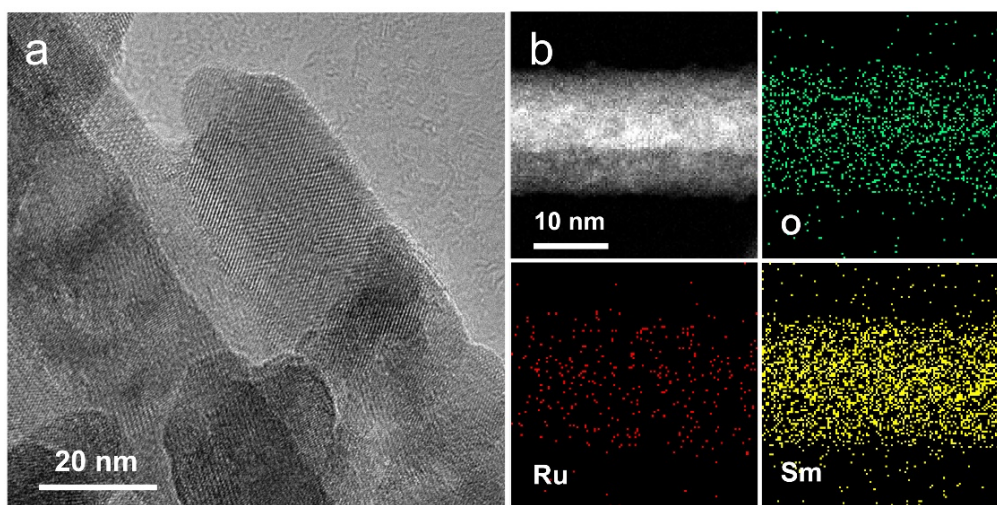

**Fig. S12.** (a) TEM image of activated 4% Ru/Sm<sub>2</sub>O<sub>3</sub> sample. (b) HAADF-STEM image and the corresponding STEM-EDX elemental maps of activated 4% Ru/Sm<sub>2</sub>O<sub>3</sub> sample.

## References

1. X. Zhang, L. Liu, A. Wu, J. Zhu, R. Si, J. Guo, R. Chen, Q. Jiang, X. Ju, J. Feng, Z. Xiong, T. He and P. Chen, *ACS Catalysis*, 2022, **12**, 2178-2190.
2. M. Kitano, Y. Inoue, Y. Yamazaki, F. Hayashi, S. Kanbara, S. Matsuishi, T. Yokoyama, S. W. Kim, M. Hara and H. Hosono, *Nature chemistry*, 2012, **4**, 934-940.
3. K. Sato, K. Imamura, Y. Kawano, S. Miyahara, T. Yamamoto, S. Matsumura and K. Nagaoka, *Chem. Sci.*, 2017, **8**, 674-679.
4. Y. Ogura, K. Sato, S. Miyahara, Y. Kawano, T. Toriyama, T. Yamamoto, S. Matsumura, S. Hosokawa and K. Nagaoka, *Chem. Sci.*, 2018, **9**, 2230-2237.
5. H. Yamashita, T. Broux, Y. Kobayashi, F. Takeiri, H. Ubukata, T. Zhu, M. A. Hayward, K. Fujii, M. Yashima, K. Shitara, A. Kuwabara, T. Murakami and H. Kageyama, *J. Am. Chem. Soc.*, 2018, **140**, 11170-11173.
6. M. Hattori, T. Mori, T. Arai, Y. Inoue, M. Sasase, T. Tada, M. Kitano, T. Yokoyama, M. Hara and H. Hosono, *Acs Catalysis*, 2018, **8**, 10977-10984.
7. M. Kitano, Y. Inoue, H. Ishikawa, K. Yamagata, T. Nakao, T. Tada, S. Matsuishi, T. Yokoyama, M. Hara and H. Hosono, *Chem. Sci.*, 2016, **7**, 4036-4043.
